# Supplementary material
Source: Springer Nature journal article supplement (https://www.springermedizin.de/resource/supplementary/13256_2011_2124_MOESM12_ESM.pdf/9649076)

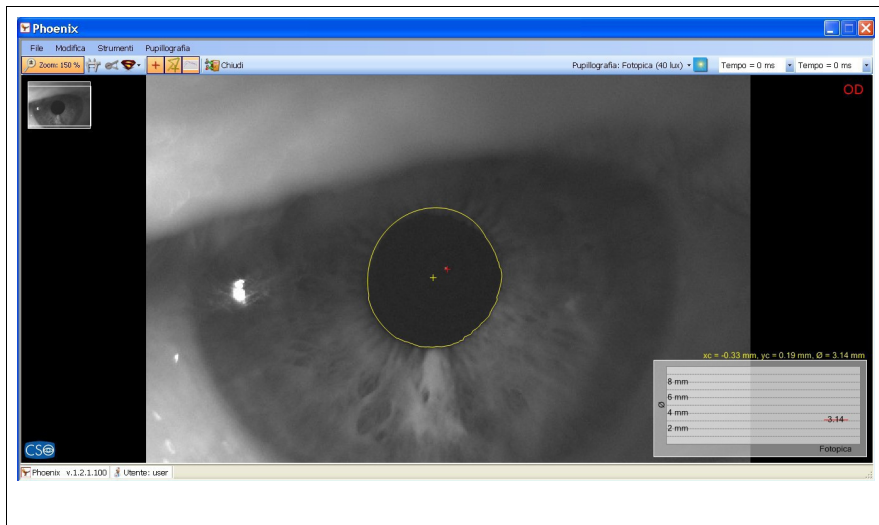

Fig. 12

Supplement: MOESM12 [file 9649076]
